# Supplementary material for: Long non-coding RNA FGD5-AS1 promotes non-small cell lung cancer cell proliferation through sponging hsa-miR-107 to up-regulate FGFRL1
Source: PubMed Central journal article supplement (PMC6981095; doi:10.1042/bsr20193309), 2020-01-24
Supplement: BSR-2019-3309_supp.pdf [file BSR-2019-3309_supp.pdf]

A

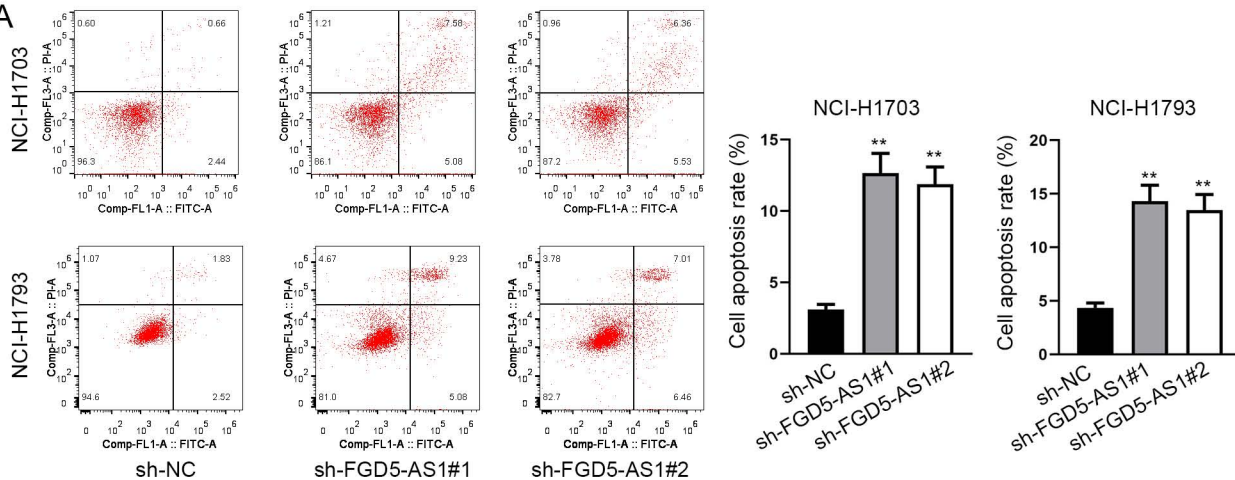

B

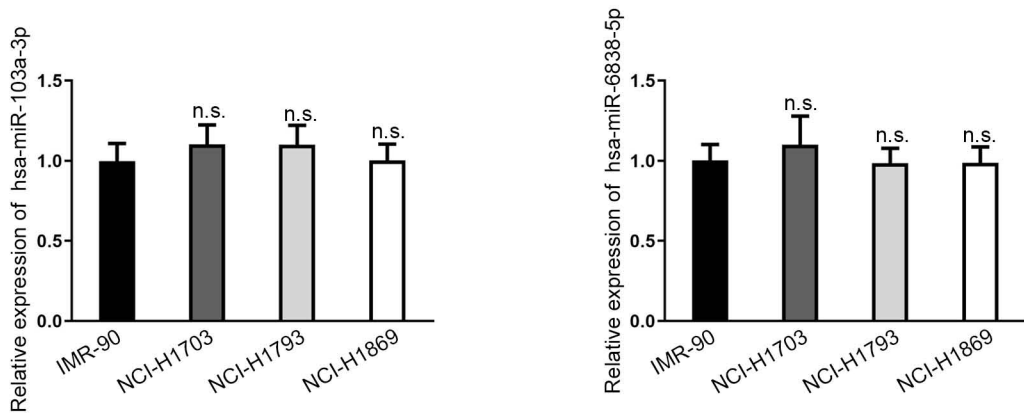

**Figure S1**(A) Flow cytometry analysis of FGD5-AS1-downregulated NSCLC cells. (B) The expression comparison of two miRNAs in one normal cell or three NSCLC cells. \*\* $P < 0.01$  indicated statistically significant differences in this figure. n.s.: no significance.

kDa

~250  
~130  
~100  
~70  
~55  
~35  
~25  
~15  
~10

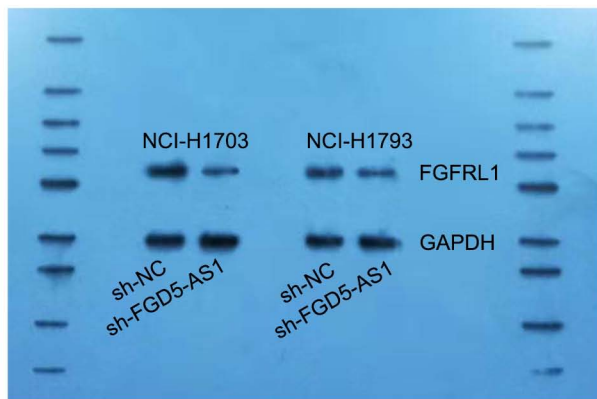

kDa

~250  
~130  
~100  
~70  
~55  
~35  
~25  
~15  
~10

kDa

~250  
~130  
~100  
~70  
~55  
~35  
~25  
~15  
~10

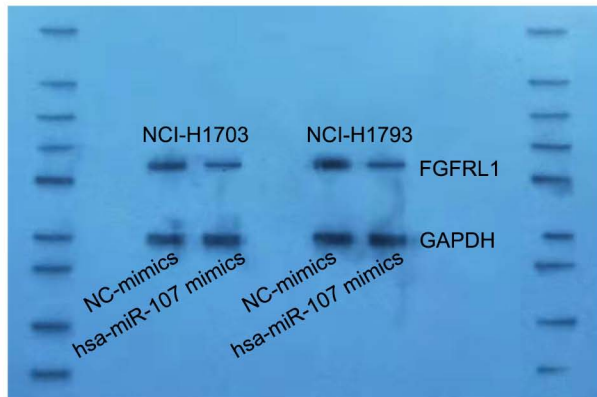

kDa

~250  
~130  
~100  
~70  
~55  
~35  
~25  
~15  
~10

**Table S1 Sequences used for FGFR1 overexpression.**

ATGACGCCGAGCCCCCTGTTGCTGCTCCTGCTGCTGCCGCCGCTGCTGCTGGGGGCCTTCCCCGCCG  
GCCGCCGCCGCCGAGGCCCCCAAAGATGGCGGACAAGGTGGTCCCACGGCAGGTGGCCCCG  
GCTGGGCCGCACTGTGCGGCTGCAGTGCCAGTGGAGGGGGACCCGCCGCCGCTGACCATGT  
GGACCAAGGATGGCCGCACCATCCACAGCGGCTGGAGCCGCTTCCGCGTGCTGCCGCAGGGG  
CTGAAGGTGAAGCAGGTGGAGCGGGAGGATGCCGGCGTGTACGTGTGCAAGGCCACCAACGG  
CTTCGGCAGCCTGAGCGTCAACTACACCCTCGTCGTGCTGGATGACATTAGCCCAGGGAAGGA  
GAGCCTGGGGCCCCGACAGCTCCTCTGGGGGTCAAGAGGACCCCGCCAGCCAGCAGTGGGCAC  
GACCGCGCTTACACAGCCCTCCAAGATGAGGCGCCGGGTGATCGCACGGCCCCGTGGGTAGCT  
CCGTGCGGCTCAAGTGCCTGGCCAGCGGGCACCCCTCGGCCCGACATCACGTGGATGAAGGAC  
GACCAGGCCTTGACGCGCCCAGAGGCCGCTGAGCCCAGGAAGAAGAAGTGGACACTGAGCC  
TGAAGAACCTGCGGCCGGAGGACAGCGGCAAATACACCTGCCGCGTGTGCAACCGCGCGGGG  
GCCATCAACGCCACCTACAAGGTGGATGTGATCCAGCGGACCCGTTCCAAGCCCCTGCTCACA  
GGCACGCACCCCGTGAACACGACGGTGGACTTCGGGGGGACCACGTCCTTCCAGTGCAAGGT  
GCGCAGCGACGTGAAGCCGGTGATCCAGTGGCTGAAGCGCGTGGAGTACGGCGCCGAGGGCC  
GCCACAACCTCCACATCGATGTGGGCGGCCAGAAGTTTGTGGTGCTGCCACGGGTGACGTGT  
GGTCGCGGCCCGACGGCTCCTACCTCAATAAGCTGCTCATCACCCGTGCCCGCCAGGACGATG  
CGGGCATGTACATCTGCCTTGGCGCCAACACCATGGGCTACAGCTTCCGCAGCGCCTTCCTCAC  
CGTGCTGCCAGACCCAAAACCGCCAGGGCCACCTGTGGCCTCCTCGTCCTCGGCCACTAGCCT  
GCCGTGGCCCCGTGGTCATCGGCATCCCAGCCGGCGCTGTCTTCATCCTGGGCACCCTGCTCCTG  
TGGCTTTGCCAGGCCCAGAAGAAGCCGTGCACCCCCGCGCCTGCCCTCCCCTGCCTGGGCAC  
CGCCCCCGGGGACGGCCCCGCGACCGCAGCGGAGACAAGGACCTTCCCTCGTTGGCCGCCCT  
CAGCGCTGGCCCTGGTGTGGGGCTGTGTGAGGAGCATGGGTCTCCGGCAGCCCCCAGCACTT  
ACTGGGCCAGGCCAGTTGCTGGCCCTAAGTTGTACCCCAAACCTCTACACAGACATCCACAC  
ACACACACACACACTCTCACACACACTCACACGTGGAGGGCAAGGTCCACCAGCACATCC  
ACTATCAGTGC
